## **Efficacy and safety of *Andrographis paniculata* extract in patients with mild COVID-19: A randomized controlled trial**

Kulthanit Wanaratna<sup>a</sup>, Pornvimol Leethong<sup>b</sup>, Nitapha Inchai<sup>a</sup>, Wararath Chueawiang<sup>a</sup>, Pantitra Sriraksa<sup>a</sup>, Anutida Tabmee<sup>a</sup>, Sayomporn Sirinavin<sup>c</sup>

<sup>a</sup>Department of Thai Traditional and Alternative Medicine, Ministry of Public Health, Thailand

<sup>b</sup>Samutprakarn Hospital, Ministry of Public Health, Thailand

<sup>c</sup>Division of Infectious Diseases, Department of Pediatrics, Faculty of Medicine Ramathibodi Hospital, Mahidol University, Thailand

Corresponding author:

Professor Sayomporn Sirinavin, MD.

Division of Infectious Disease, Department of Pediatrics

Faculty of Medicine Ramathibodi Hospital, Mahidol University

270 Rama VI Road, Rajathevi, Bangkok 10400, Thailand

E-mail: sayomporn.sir@mahidol.ac.th

### **Disclaimer**

The authors have withdrawn this manuscript titled “Efficacy and safety of *Andrographis paniculata* extract in patients with mild COVID-19: A randomized controlled trial” because this manuscript has been noticed an error of statistical analysis which could be misleading. Therefore, the authors do not wish this work to be cited as reference for the project. If you have any questions, please contact the corresponding author.
